# Supplementary material for: Non-phase-separated 2D B–C–N alloys via molecule-like carbon doping in 2D BN: atomic structures and optoelectronic properties
Source: Royal Society of Chemistry journal article supplement (doi:10.1039/c8cp03028f), 2018-01-01
Supplement: c8cp03028f1.pdf [file c8cp03028f1.pdf]

## **Supporting Information**

### **Non-phase-separated 2D B-C-N alloys via molecule-like carbon doping in 2D BN: Atomic structures and optoelectronic properties**

Xiang-Yang Ren<sup>a</sup>, Sha Xia<sup>a</sup>, Xian-Bin Li<sup>a,b\*</sup>, Nian-Ke Chen<sup>a</sup>, Xue-Peng Wang<sup>a</sup>, Dan Wang<sup>a</sup>,  
Zhan-Guo Chen<sup>a</sup>, Shengbai Zhang<sup>a,b</sup>, and Hong-Bo Sun<sup>a,c</sup>

*<sup>a</sup>State Key Laboratory of Integrated Optoelectronics, College of Electronic Science and  
Engineering, Jilin University, Changchun 130012, China*

*<sup>b</sup>Department of Physics, Applied Physics, and Astronomy, Rensselaer Polytechnic Institute, Troy,  
New York 12180, USA*

*<sup>c</sup>State Key Lab of Precision Measurement Technology and Instruments, Department of Precision  
Instrument, Tsinghua University, Beijing, 100084, China.*

---

\*Corresponding author: Prof. Xian-Bin Li, State Key Laboratory of Integrated Optoelectronics, College of Electronic Science and Engineering, Jilin University, 2699 Qianjin Street, Changchun, 130012, China.

E-mail address: [lixianbin@jlu.edu.cn](mailto:lixianbin@jlu.edu.cn) (X.-B. Li).

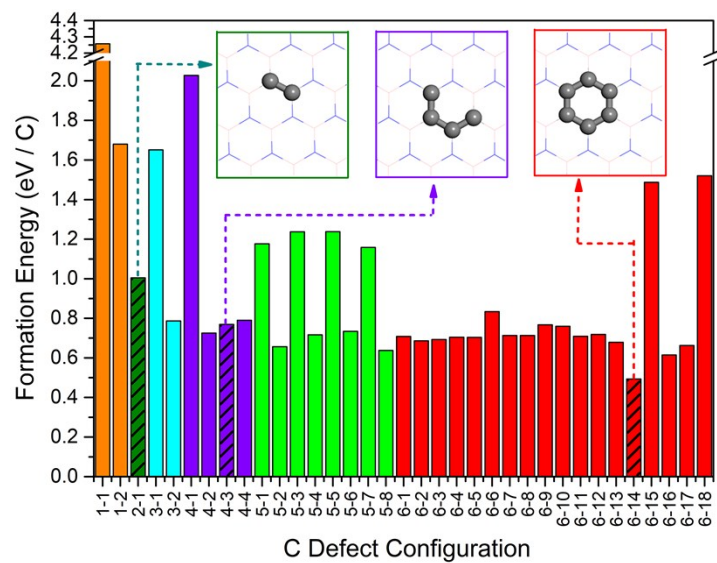

**Fig. S1.** Formation energy of carbon defect motifs in B-rich condition. Color coding of atom: pink for B, blue for N, and grey for C. The notation “ $m$ - $n$ ” is illustrated in the main text and is related to the defect motif shown in Fig. 1(a).

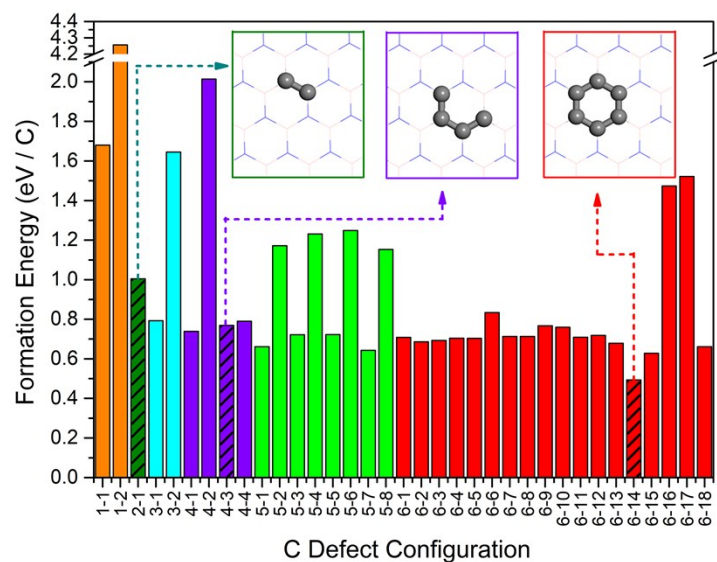

**Fig. S2.** Formation energy of carbon defect motifs in N-rich condition.

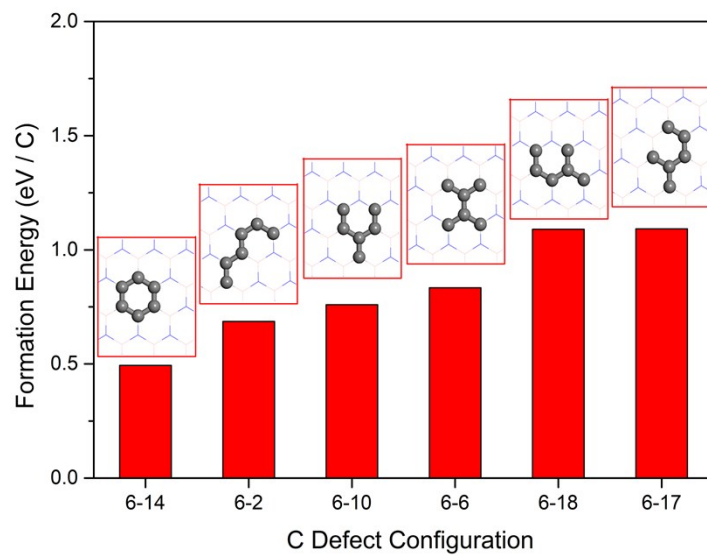

**Fig. S3.** Formation energies for the representative six-carbon defects. Their corresponding local pictures are shown in the insets. The notifications “ $m$ - $n$ ” are the same as Fig.1 in the main text.

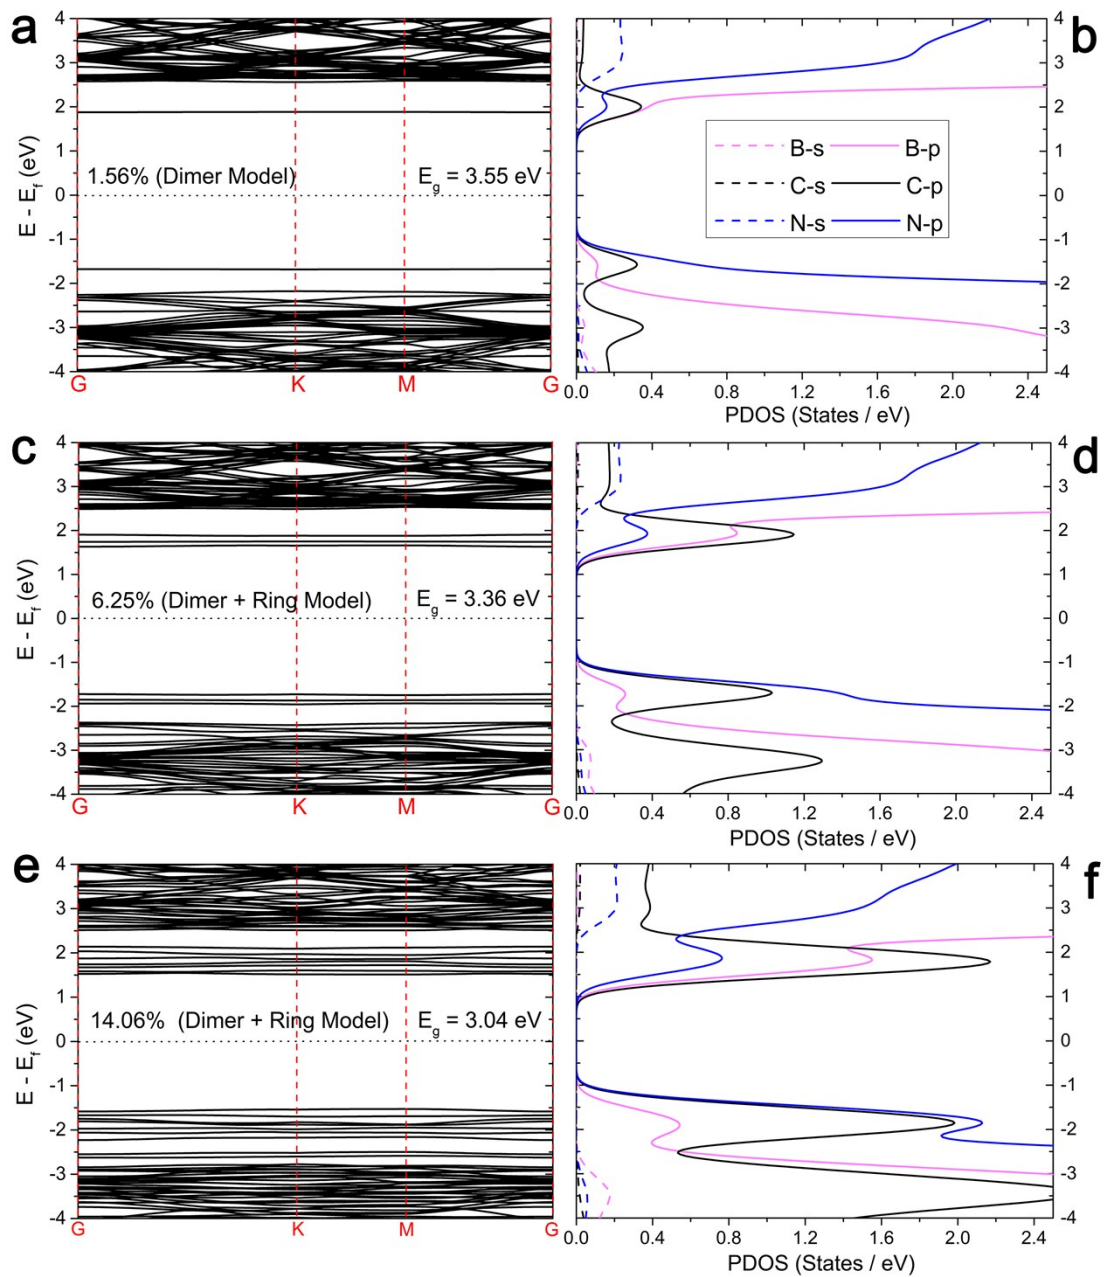

**Fig. S4.** Band structures and partial DOS (PDOS) of the typical B-C-N alloy models. (a), (c) and (e) are the band structures with carbon concentration of 1.56%, 6.25%, 14.06%, respectively. (b), (d), (f) are the PDOS of (a), (c), (e) respectively.
